# Supplementary material for: Efficacy and Safety of MIN-101: A 12-Week Randomized, Double-Blind, Placebo-Controlled Trial of a New Drug in Development for the Treatment of Negative Symptoms in Schizophrenia
Source: Atypon-hosted journal article supplement (doi:10.1176/appi.ajp.2017.17010122), 2017-07-28

FIGURE S1. Flowchart of Patients' Progress Through the Study

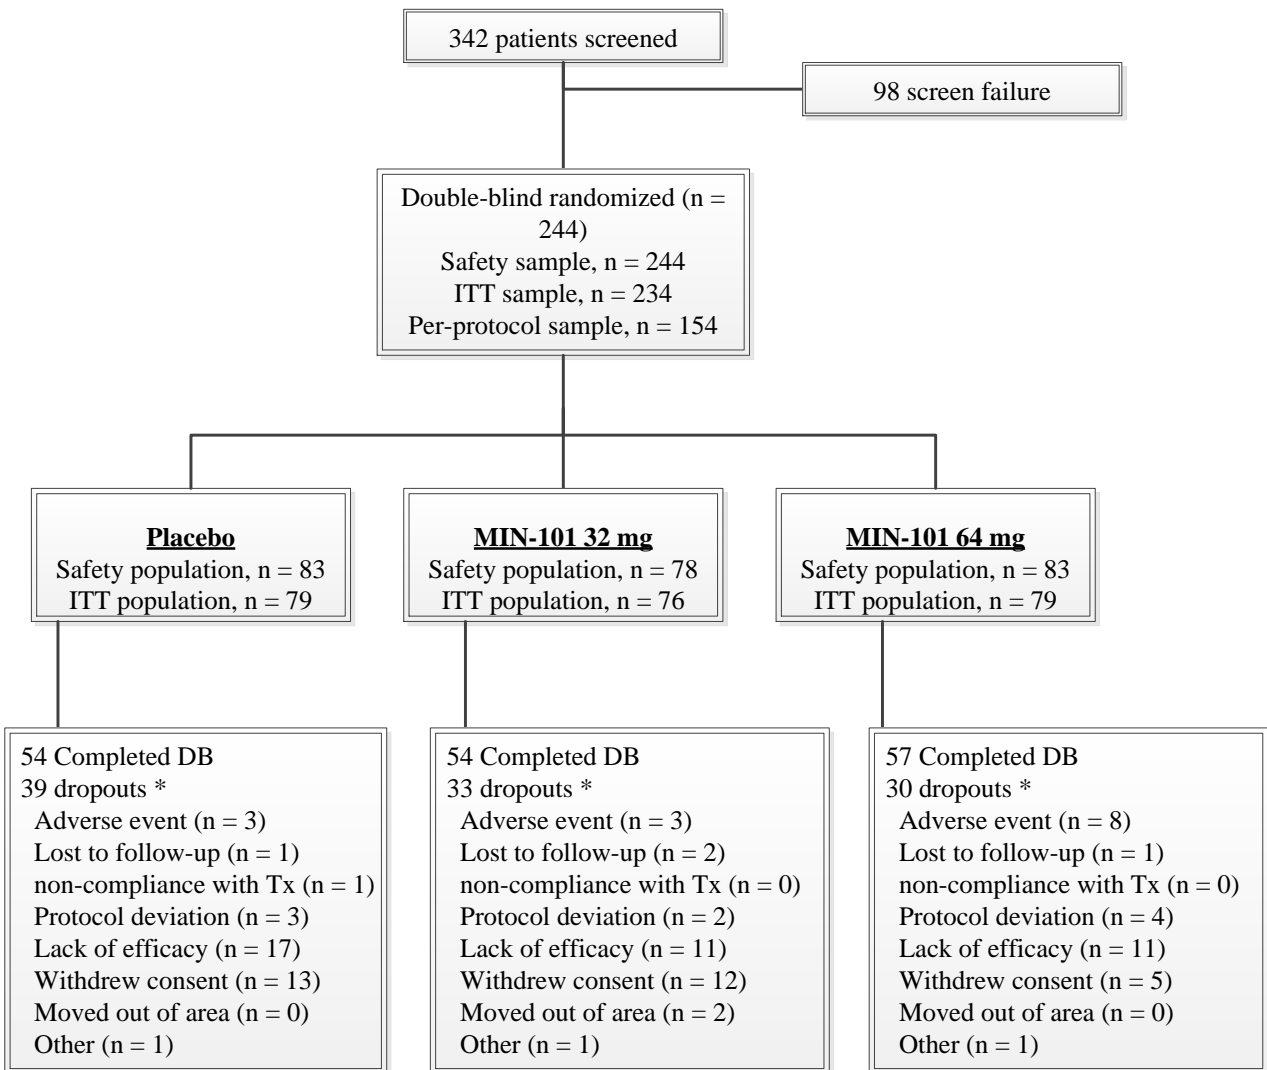

\* Including patients who dropped out after completion of Week 12 assessments due to refusal to be hospitalized at onset of open label phase: Placebo (n = 10); MIN-101 32 mg (n = 9); MIN-101 64 mg (n = 4)

FIGURE S2. Change From Baseline in the PANSS Negative Scale Scores

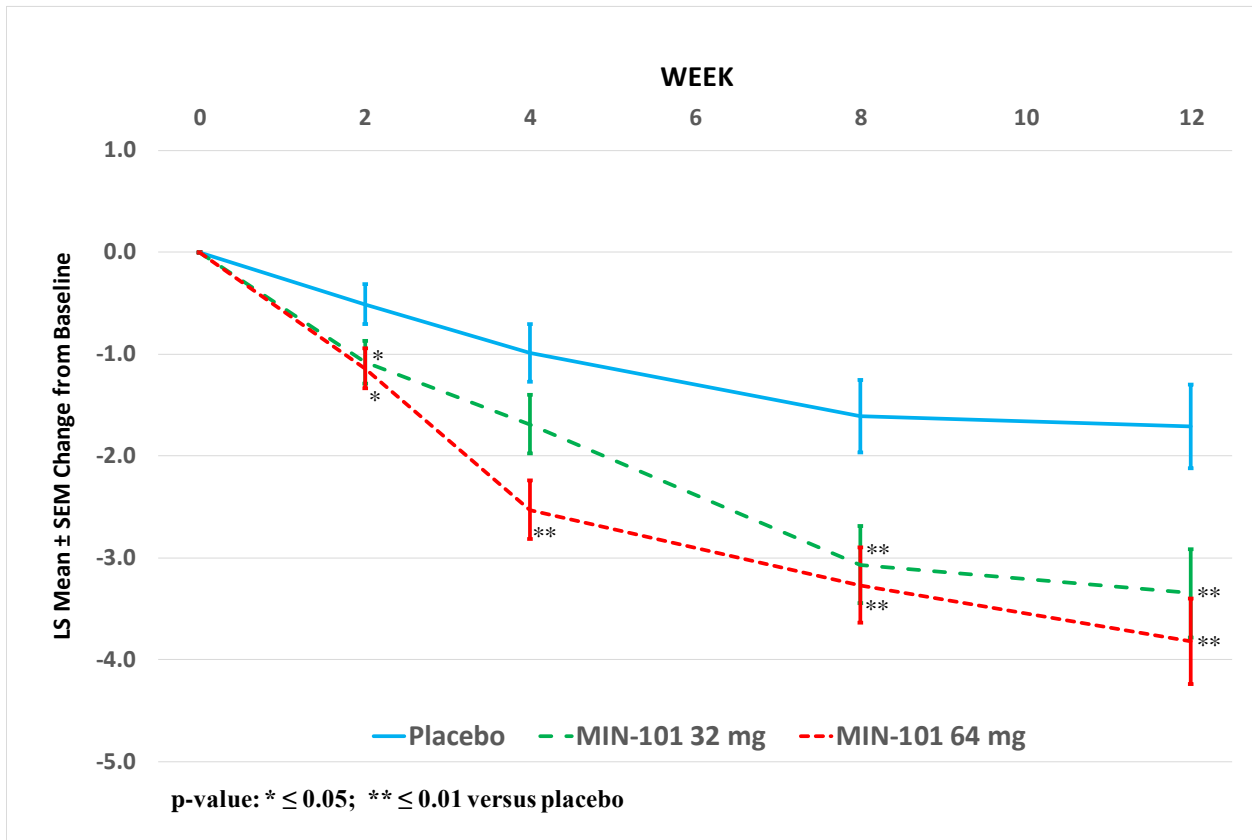

Supplement: appi.ajp.2017.17010122.ds001.pdf [file appi.ajp.2017.17010122.ds001.pdf]
