# Supplementary material for: Efficacy and Safety of MIN-101: A 12-Week Randomized, Double-Blind, Placebo-Controlled Trial of a New Drug in Development for the Treatment of Negative Symptoms in Schizophrenia
Source: Atypon-hosted journal article supplement (doi:10.1176/appi.ajp.2017.17010122), 2017-07-28
Supplement: appi.ajp.2017.17010122.ds001.pdf [file appi.ajp.2017.17010122.ds001.pdf]

 


Psychiatry Online
